# Supplementary material for: Efficient catalytic activity of NiO and CeO2 films in benzoic acid removal using ozone
Source: Royal Society of Chemistry journal article supplement (doi:10.1039/d3ra07316e), 2024-01-01
Supplement: d3ra07316e1.pdf [file d3ra07316e1.pdf]

## SUPPLEMENTARY INFORMATION

### Efficient catalytic activity of NiO and CeO<sub>2</sub> films for benzoic acid removal by ozone

Daynahi Franco-Pelález<sup>1</sup>, Julia Liliana Rodríguez S.\*<sup>1</sup>, Tatiana Poznyak<sup>1</sup>, Hugo Martínez Gutiérrez<sup>2</sup>, J. Alberto Andraca Adame<sup>3</sup>, Luis Lartundo Rojas<sup>2</sup>, Claudia Ramos Torres<sup>2</sup>

<sup>1</sup> Laboratorio de Investigación en Ingeniería Química Ambiental, ESIQIE-Instituto Politécnico Nacional, Zacatenco, Ciudad de México 07738, México.

<sup>2</sup> Centro de Nanociencias y Micro y Nanotecnologías. Instituto Politécnico Nacional. Zacatenco, Ciudad de México, 07738, México

<sup>3</sup> Departamento Ciencias Básicas, UPIIH—Instituto Politécnico Nacional, Mexico City, 42050, Mexico

#### Corresponding author

*Julia Liliana Rodríguez S.*

Laboratorio de Investigación en Ingeniería Química Ambiental, ESIQIE-Instituto Politécnico Nacional, Zacatenco, Ciudad de México 07738, México. e-mail. jlrodriguezs@ipn.mx; ozliliana@yahoo.com.mx

**Table S1.** Relative peak positions (principals, multiplets and satellites) for Ni2p<sub>3/2</sub> and Ni2p<sub>1/2</sub> contributions

| Thin film | Species             | Fitting   | Binding energy, eV |                   |
|-----------|---------------------|-----------|--------------------|-------------------|
|           |                     |           | 2p <sub>3/2</sub>  | 2p <sub>1/2</sub> |
| NiO       | NiO                 | Principal | 853.47             | 870.88            |
|           |                     | Mult. 1   | 854.68             | 872.11            |
|           |                     | Sat. 1    | 859.25             | 876.77            |
|           |                     | Sat. 2    | 861.60             | 879.10            |
|           |                     | Sat. 3    | 866.01             | 882.60            |
|           | NiOOH               | Principal | 855.21             | 872.66            |
|           |                     | Mult. 1   | 855.66             | 873.30            |
|           |                     | Mult. 2   | 858.12             | 875.70            |
|           |                     | Mult. 3   | 860.27             | 877.68            |
|           |                     | Sat. 1    | 860.81             | 878.35            |
|           |                     | Sat. 2    | 862.87             | 880.57            |
|           |                     | Sat. 3    | 867.33             | 884.07            |
|           | Ni(OH) <sub>2</sub> | Principal | 856.43             | 873.89            |
|           |                     | Mult. 1   | 857.03             | 874.59            |
|           |                     | Mult. 2   | 859.21             | 876.66            |
|           |                     | Sat. 1    | 863.31             | 880.41            |
|           |                     | Sat. 2    | 864.63             | 881.98            |
|           |                     | Sat. 3    | 868.78             | 885.69            |

**Table S2.** Energy position of Ce3d<sub>3/2</sub> and Ce3d<sub>5/2</sub> spin-orbit components in CeO<sub>2</sub> thin film

| Thin film              | v <sub>0</sub> | v     | v'    | v''   | v'''  | u <sub>0</sub> | u     | u'    | u''   | u'''  |
|------------------------|----------------|-------|-------|-------|-------|----------------|-------|-------|-------|-------|
| <b>CeO<sub>2</sub></b> | 881.6          | 883.1 | 885.3 | 888.2 | 897.3 | 899            | 900.3 | 903.6 | 906.7 | 916.1 |

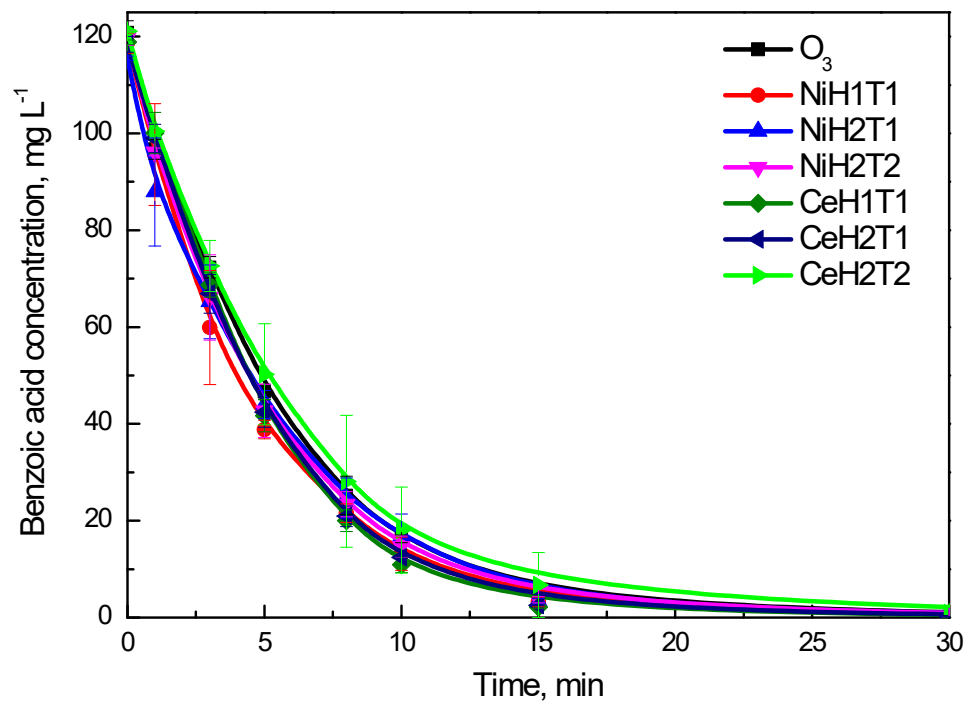

**Figure S1.** BA decomposition profiles by conventional and catalytic ozonation

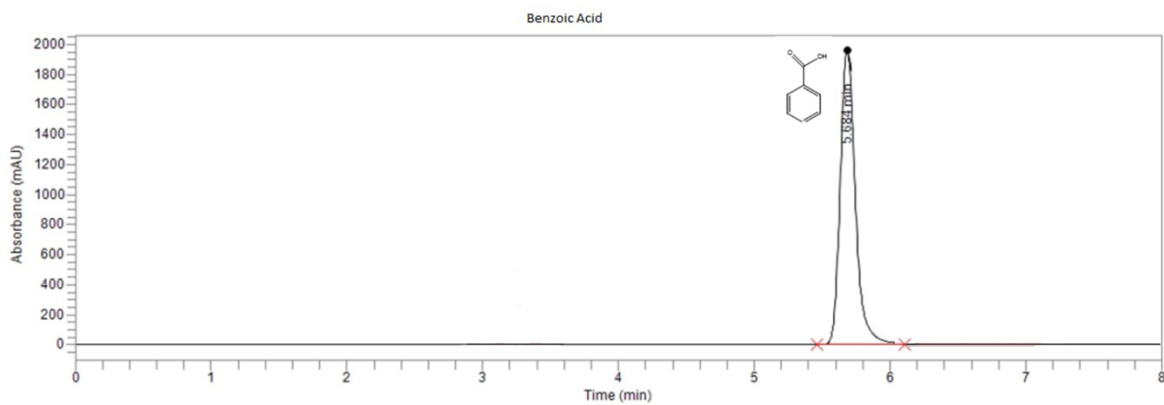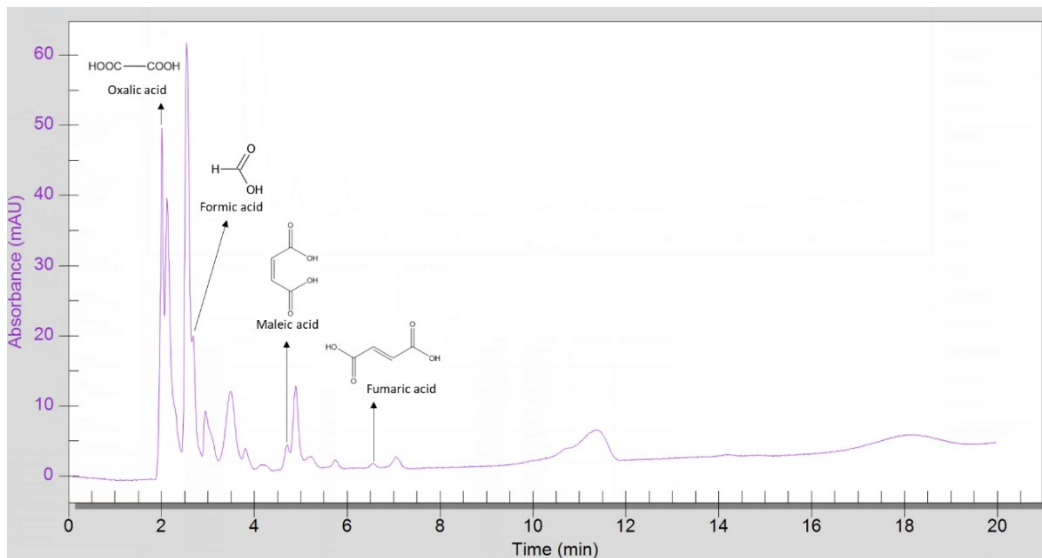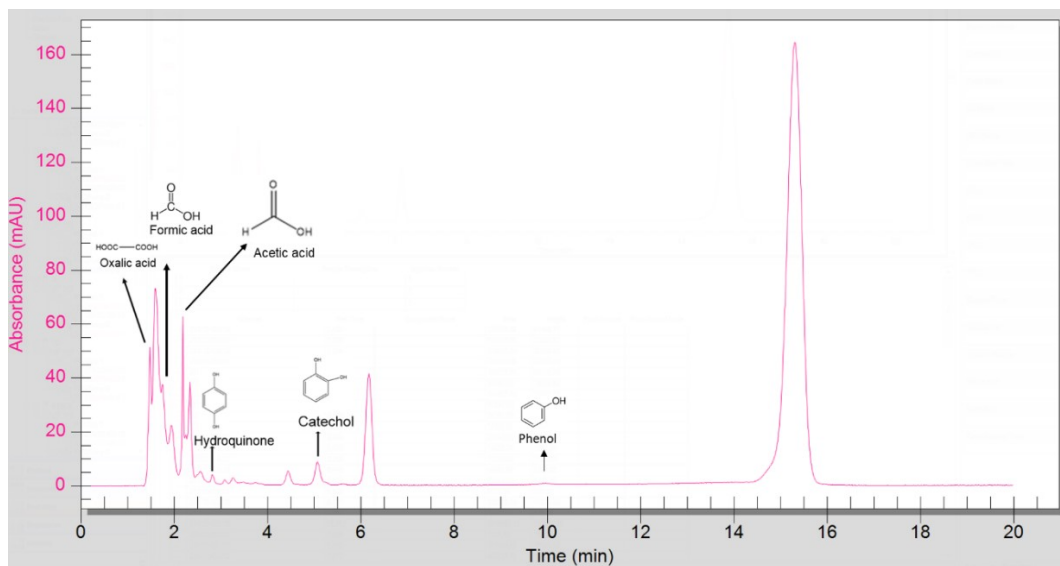

**Figure S2.** HPLC Chromatograms for the identification of byproducts obtained of BA removal

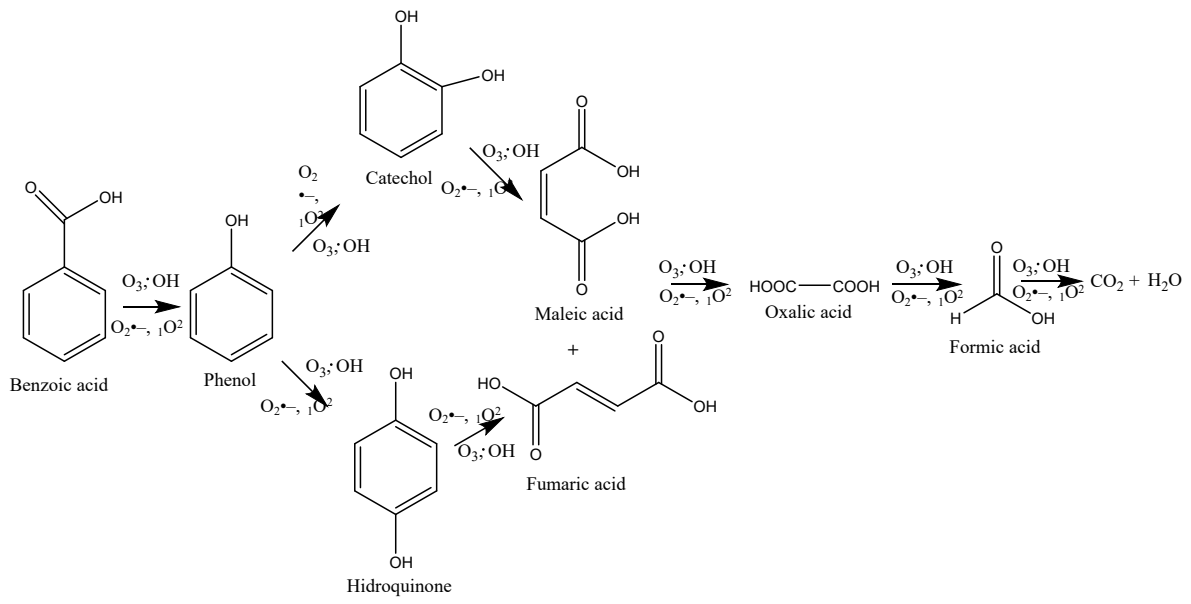

Figure S3. Proposed pathway of BA removal by catalytic ozonation.
